# Supplementary material for: Assessment of pharmacologically induced changes in canine kidney function by multiparametric magnetic resonance imaging and contrast enhanced ultrasound
Source: Front Vet Sci. 2024 Jun 20;11:1406343. doi: 10.3389/fvets.2024.1406343 (PMC11223176; doi:10.3389/fvets.2024.1406343)
Supplement: SUPPLEMENTARY DATA SHEET S6 — Excel file with renal blood flow parameters measured with CEUS. [file Data_Sheet_6.xlsx]

## Sheet: Blad1
Renal blood flow parameters measured with CEUS
			CEUS Left Kidney Cortex						CEUS Left Kidney Medulla						CEUS Left Kidney Whole kidney						CEUS Right Kidney Cortex						CEUS Right Kidney Medulla						CEUS Right Kidney Whole kidney
Subject number	Time point	Treatment	Peak Intensity (PI) [a.u.]	Time to peak (TTP) [s]	WiR (Wash-in rate) [a.u./s]	AUC (Area under the curve)	RT (Rise time) [s]	FT (Fall time) [s]	PI [a.u.]	TTP [s]	WiR [a.u./s]	AUC	RT [s]	FT [s]	PI [a.u.]	TTP [s]	WiR [a.u./s]	AUC	RT [s]	FT [s]	PI [a.u.]	TTP [s]	WiR [a.u./s]	AUC	RT [s]	FT [s]	PI [a.u.]	TTP [s]	WiR [a.u./s]	AUC	RT [s]	FT [s]	PI [a.u.]	TTP [s]	WiR [a.u./s]	AUC	RT [s]	FT [s]
1	1	Control	11.3211	13.82	1.21724	112.957	7.78853	11.8222	3.43016	19.75	0.338836	16.3522	7.12839	5.65536	6.94871	13.93	0.843731	78.2569	7.14133	13.2857	5.71065	14.5	1.01173	46.7118	6.28156	9.47891	2.78435	18.72	0.414064	11.1109	5.84292	3.39835	4.11516	14.27	0.864817	36.9892	5.43443	11.0665
1	2	Dopamine	15.038	11.83	2.58475	251.065	6.8948	23.6883	7.36823	18.3	0.515844	86.8938	11.427	16.1593	11.481	12.11	1.95611	187.495	7.46208	24.1135	11.6645	14.27	2.30792	161.881	7.04222	16.4902	4.23048	18.93	0.589776	22.5334	6.07039	4.35468	9.39548	14.12	1.91402	175.412	6.94445	28.0991
2	1	Dopamine	11.8091	13.82	2.86759	270.545	5.35683	33.2223	6.72694	21.12	0.511106	57.7319	9.16657	11.3944	8.20484	13.47	1.80174	199.313	5.12954	37.9252	8.88667	14.39	1.62915	101.947	6.38251	13.7767	2.09516	18.72	0.181849	13.7208	7.49668	7.64119	4.7737	14.84	0.968501	53.6583	6.22606	14.3709
2	2	Control	14.8948	13.19	4.95687	253.503	4.98285	24.3734	6.77048	17.06	0.747007	46.3589	6.5019	10.6891	9.69258	13.5	3.44631	155.31	5.19863	22.4657	8.17118	13.34	1.51896	83.658	6.21163	12.8295	1.54823	16.91	0.306682	7.14193	4.50081	7.97507	3.84129	13.34	0.821929	36.0876	5.53844	11.0116
3	1	Control	13.3858	13.56	3.59894	280.398	6.67873	33.4632	5.13645	21.77	0.25253	68.3828	14.4187	13.8784	8.95	13.39	2.58467	203.112	6.51028	34.9041	12.9232	11.22	3.97642	188.808	6.14706	25.9229	3.65452	17.24	0.442685	39.9463	7.09611	15.5238	8.83	11.05	2.95703	154.567	5.88226	31.3723
3	2	Dopamine	15.3588	11.69	3.85349	340.736	6.9787	43.1066	6.37371	17.99	0.774594	60.1423	6.87897	17.9268	11.3303	11.69	3.02944	255.534	6.72961	40.5287	9.15409	13.12	1.44829	94.6062	8.14136	12.2869	2.29145	15.6	0.263786	17.9243	7.59166	10.0511	2.81419	13.89	0.334796	26.7276	8.12477	10.6379
4	1	Control	15.0726	14.56	3.92456	318.957	5.70177	41.3743	4.50355	23.13	0.752801	23.2575	4.83962	8.23927	10.2694	14.19	2.57766	163.205	5.07296	25.7307	13.6423	15.77	2.2295	285.188	8.11806	31.7699	2.005	20.56	0.198209	18.3825	7.94295	19.9431	10.1616	15.35	1.76828	159.988	7.21054	20.6182
4	2	Dopamine	9.92742	12.21	2.53796	115.085	7.10559	13.0711	4.98242	18.76	0.230389	29.365	9.48873	8.21891	6.86806	13.11	1.5951	87.9969	8.13063	15.6152	4.4279	12.25	1.39928	33.6174	6.19004	5.73041	0.643065	17.32	0.0548049	2.73111	7.11197	4.90101	1.99968	12.25	0.859183	19.3335	5.7983	12.0658
5	1	Control	13.1525	10.96	2.88409	119.363	5.88667	9.98177	7.16952	14.73	0.947704	32.4254	6.83093	4.93286	9.48032	11.3	2.29971	90.4575	6.01235	9.57372	8.61161	11.87	2.44584	71.0751	5.65514	7.7357	2.26677	17.08	0.174325	15.5887	8.45292	13.4558	6.28581	11.59	1.48543	53.4635	5.73171	9.24026
5	2	Dopamine	9.15806	15.17	1.73613	70.5393	6.08009	7.33087	3.06581	20.8	0.419004	33.4061	7.45728	16.2562	5.26806	15.3	0.94356	45.4401	6.19074	9.21145	10.512	15.05	1.71551	99.3997	7.51342	9.40865	3.85887	24.6	0.232844	27.5717	10.3388	7.44935	6.87258	15.05	1.2133	64.5325	6.81758	9.70735
6	1	Control	14.7718	11.08	2.8989	296.883	6.99569	36.5373	7.95468	19.64	0.580822	87.0347	11.5014	11.3595	11.3016	11.3	2.66417	215.7	6.86265	32.5111	11.863	11.26	3.14781	153.239	5.1659	18.8617	6.05274	16.15	0.954171	57.8309	5.90403	15.8096	7.9529	11.62	2.08816	107.535	5.29063	20.939
6	2	Dopamine	11.2571	13.62	4.52161	127.489	5.41052	12.3039	4.46419	17.48	0.671692	45.2547	7.52838	11.6307	7.44581	13.49	2.48652	111.096	5.27283	21.6934	9.81226	11.95	3.96828	111.894	4.83234	14.2557	3.97403	17.22	0.556776	35.6666	8.8344	7.25638	6.51935	12.34	2.78075	78.7263	5.12949	15.2924
7	1	Dopamine	10.0127	14.64	1.34115	110.57	6.25721	13.628	4.15694	22.39	0.514696	45.5216	7.25769	15.7211	5.47774	16.33	0.778939	78.0584	7.45659	19.617	8.47484	14.36	1.9427	66.6396	5.13881	9.07405	2.57177	22.11	0.174507	31.3935	11.5633	17.7532	4.14484	14.22	0.927093	36.3085	5.03739	10.4834
7	2	Control	11.127	13.88	2.03803	112.782	6.90355	11.6638	4.23855	20.56	0.395772	31.9891	7.6795	13.6894	7.57871	13.75	1.46062	88.3329	6.75151	12.9022	9.89726	15.04	1.43984	84.8302	7.14863	9.41836	3.87452	19.02	0.917921	15.5448	4.0042	6.64413	4.3571	14.14	0.827616	40.5318	6.07765	10.0253
8	1	Dopamine	10.2914	14.5	2.64603	101.744	4.86772	11.4298	4.17323	18.73	0.690458	33.1502	6.92978	7.9204	4.84194	15.07	1.23636	67.6629	5.43881	21.3408	11.3145	15.21	1.27196	164.856	8.24491	19.0298	2.35387	24.78	0.164926	19.346	12.0365	7.40613	5.41387	15.21	0.645347	71.2087	7.05643	19.4465
8	2	Control	11.322	13.52	2.72549	134.742	5.3692	14.4455	3.71339	20.7	0.258538	34.3783	12.1696	9.67867	6.98227	13.66	1.71143	102.6	5.43983	21.113	9.92172	13.66	2.85437	78.6897	4.86971	8.7475	3.27968	16.9	0.404614	24.9778	7.4435	10.1008	4.94581	13.38	1.43646	39.5604	4.6407	8.73794
